# Supplementary material
Source: MDPI journal article supplement (https://www.mdpi.com/2073-4344/12/1/45)
Supplement: s1 [file s1]

# Heterogeneous gold nanoparticle-based catalysts for the synthesis of click-derived triazoles via the azide-alkyne cycloaddition reaction

Ivy L. Librando,<sup>1</sup> Abdallah G. Mahmoud,<sup>1,2</sup> Sónia A.C. Carabineiro,<sup>1,3,4\*</sup> M. Fátima C. Guedes da Silva,<sup>1</sup> F.J. Maldonado-Hódar,<sup>5</sup> Carlos F.G.C. Geraldès,<sup>6,7</sup> Armando J.L. Pombeiro<sup>1,8</sup>

<sup>1</sup> Centro de Química Estrutural, Instituto Superior Técnico, Universidade de Lisboa, Av. Rovisco Pais, 1049-001 Lisboa, Portugal; ivy.librando@tecnico.ulisboa.pt (I.L.L.); abdallah.mahmoud@tecnico.ulisboa.pt (A.G.M.); fatima.guedes@tecnico.ulisboa.pt (M.F.C.G.d.S.); pombeiro@tecnico.ulisboa.pt (A.J.L.P.)

<sup>2</sup> Department of Chemistry, Faculty of Science, Helwan University, Ain Helwan, Cairo 11795, Egypt

<sup>3</sup> Laboratory of Catalysis and Materials (LCM), Associate Laboratory LSRE-LCM, Faculty of Engineering, University of Porto, 4200-465 Porto, Portugal

<sup>4</sup> LAQV-REQUIMTE, Department of Chemistry, NOVA School of Science and Technology, Universidade NOVA de Lisboa, 2829-516 Caparica, Portugal

<sup>5</sup> Department of Inorganic Chemistry, Faculty of Sciences, University of Granada, Avenida de Fuente Nueva, s/n, 18071 Granada, Spain; fjmaldon@ugr.es

<sup>6</sup> Department of Life Sciences, Faculty of Science and Technology, Calçada Martim de Freitas, 3000-393 Coimbra, Portugal; geraldès@uc.pt

<sup>7</sup> Coimbra Chemistry Center, University of Coimbra, Rua Larga Largo D. Dinis, 3004-535 Coimbra, Portugal

<sup>8</sup> Peoples' Friendship University of Russia (RUDN University), Research Institute of Chemistry, 6 Miklukho-Maklaya Street, Moscow, 117198, Russian Federation

\* Correspondence: sonia.carabineiro@fct.unl.pt (S.A.C.C.)

**Table S1.** Optimization of reaction parameters for the microwave-assisted synthesis of 1,2,3-triazole catalyzed by Au nanoparticles on different supports. <sup>a</sup>

| Entry | Catalyst                          | Catalyst loading, <sup>b</sup><br>mol % | Weight of catalyst (g) | Temperature, °C | Time, min | Total volume of solvent, mL | Yield, <sup>c</sup> % | TON <sup>d</sup> |
|-------|-----------------------------------|-----------------------------------------|------------------------|-----------------|-----------|-----------------------------|-----------------------|------------------|
| 1     | Au/ZnO                            | 0.13                                    | 0.0059                 | 80              | 15        | 1.5                         | 25                    | 189              |
| 2     | Au/Fe <sub>2</sub> O <sub>3</sub> | 0.08                                    | 0.0059                 | 80              | 15        | 1.5                         | 26                    | 321              |
| 3     | Au/TiO <sub>2</sub>               | 0.16                                    | 0.0059                 | 80              | 15        | 1.5                         | 25                    | 158              |
| 4     | Au/Al <sub>2</sub> O <sub>3</sub> | 0.07                                    | 0.0059                 | 80              | 15        | 1.5                         | 29                    | 417              |
| 5     | Au/TiO <sub>2</sub> (W)           | 0.15                                    | 0.0059                 | 80              | 15        | 1.5                         | 22                    | 145              |
| 6     | Au/C (W)                          | 0.1                                     | 0.0059                 | 80              | 15        | 1.5                         | 23                    | 232              |
| 7     | Blank                             | -                                       | -                      | 80              | 15        | 1.5                         | 0                     | n/a              |
| 8     | Au/ZnO                            | 0.13                                    | 0.0059                 | 100             | 15        | 1.5                         | 24                    | 186              |
| 9     | Au/Fe <sub>2</sub> O <sub>3</sub> | 0.08                                    | 0.0059                 | 100             | 15        | 1.5                         | 36                    | 446              |
| 10    | Au/TiO <sub>2</sub>               | 0.16                                    | 0.0059                 | 100             | 15        | 1.5                         | 35                    | 220              |
| 11    | Au/Al <sub>2</sub> O <sub>3</sub> | 0.07                                    | 0.0059                 | 100             | 15        | 1.5                         | 28                    | 395              |
| 12    | Au/TiO <sub>2</sub> (W)           | 0.15                                    | 0.0059                 | 100             | 15        | 1.5                         | 39                    | 261              |
| 13    | Au/C (W)                          | 0.1                                     | 0.0059                 | 100             | 15        | 1.5                         | 36                    | 358              |
| 14    | Au/ZnO                            | 0.13                                    | 0.0059                 | 80              | 15        | 0.5                         | 30                    | 233              |
| 15    | Au/Fe <sub>2</sub> O <sub>3</sub> | 0.08                                    | 0.0059                 | 80              | 15        | 0.5                         | 35                    | 436              |
| 16    | Au/TiO <sub>2</sub>               | 0.16                                    | 0.0059                 | 80              | 15        | 0.5                         | 34                    | 212              |
| 17    | Au/Al <sub>2</sub> O <sub>3</sub> | 0.07                                    | 0.0059                 | 80              | 15        | 0.5                         | 37                    | 534              |
| 18    | Au/TiO <sub>2</sub> (W)           | 0.15                                    | 0.0059                 | 80              | 15        | 0.5                         | 31                    | 207              |
| 19    | Au/C (W)                          | 0.1                                     | 0.0059                 | 80              | 15        | 0.5                         | 28                    | 279              |
| 20    | Au/ZnO                            | 0.1                                     | 0.0045                 | 100             | 15        | 0.5                         | 28                    | 279              |
| 21    | Au/Fe <sub>2</sub> O <sub>3</sub> | 0.1                                     | 0.0074                 | 100             | 15        | 0.5                         | 41                    | 414              |
| 22    | Au/TiO <sub>2</sub>               | 0.1                                     | 0.0037                 | 100             | 15        | 0.5                         | 40                    | 395              |
| 23    | Au/Al <sub>2</sub> O <sub>3</sub> | 0.1                                     | 0.0084                 | 100             | 15        | 0.5                         | 43                    | 431              |
| 24    | Au/TiO <sub>2</sub> (W)           | 0.1                                     | 0.0037                 | 100             | 15        | 0.5                         | 28                    | 291              |
| 25    | Au/C (W)                          | 0.1                                     | 0.0059                 | 100             | 15        | 0.5                         | 27                    | 269              |
| 26    | Au/Fe <sub>2</sub> O <sub>3</sub> | 0.1                                     | 0.0074                 | 100             | 15        | 0.25                        | 34                    | 344              |
| 27    | Au/TiO <sub>2</sub>               | 0.1                                     | 0.0037                 | 100             | 15        | 0.25                        | 35                    | 351              |
| 28    | Au/Al <sub>2</sub> O <sub>3</sub> | 0.1                                     | 0.0084                 | 100             | 15        | 0.25                        | 31                    | 313              |
| 29    | Au/Fe <sub>2</sub> O <sub>3</sub> | 0.1                                     | 0.0074                 | 100             | 60        | 0.5                         | 40                    | 401              |
| 30    | Au/TiO <sub>2</sub>               | 0.1                                     | 0.0037                 | 100             | 60        | 0.5                         | 44                    | 438              |
| 31    | Au/Al <sub>2</sub> O <sub>3</sub> | 0.1                                     | 0.0084                 | 100             | 60        | 0.5                         | 40                    | 400              |
| 32    | Au/ZnO                            | 0.1                                     | 0.0045                 | 150             | 15        | 0.5                         | 63                    | 633              |
| 33    | Au/Fe <sub>2</sub> O <sub>3</sub> | 0.1                                     | 0.0074                 | 150             | 15        | 0.5                         | 66                    | 659              |
| 34    | Au/TiO <sub>2</sub>               | 0.1                                     | 0.0037                 | 150             | 15        | 0.5                         | 64                    | 639              |
| 35    | Au/Al <sub>2</sub> O <sub>3</sub> | 0.1                                     | 0.0084                 | 150             | 15        | 0.5                         | 67                    | 672              |
| 36    | Au/TiO <sub>2</sub> (W)           | 0.1                                     | 0.0037                 | 150             | 15        | 0.5                         | 60                    | 602              |
| 37    | Au/C (W)                          | 0.1                                     | 0.0059                 | 150             | 15        | 0.5                         | 62                    | 622              |
| 38    | Blank                             | -                                       | -                      | 150             | 15        | 0.5                         | 28                    | n/a              |

|    |                                   |      |        |     |    |     |    |                  |
|----|-----------------------------------|------|--------|-----|----|-----|----|------------------|
| 39 | Au/ZnO                            | 0.5  | 0.0225 | 150 | 15 | 0.5 | 67 | 134              |
| 40 | Au/Fe <sub>2</sub> O <sub>3</sub> | 0.5  | 0.037  | 150 | 15 | 0.5 | 73 | 146              |
| 41 | Au/TiO <sub>2</sub>               | 0.5  | 0.0185 | 150 | 15 | 0.5 | 75 | 150              |
| 42 | Au/Al <sub>2</sub> O <sub>3</sub> | 0.5  | 0.0420 | 150 | 15 | 0.5 | 70 | 140              |
| 43 | Au/TiO <sub>2</sub> (W)           | 0.5  | 0.0195 | 150 | 15 | 0.5 | 69 | 139              |
| 44 | Au/C (W)                          | 0.5  | 0.0295 | 150 | 15 | 0.5 | 67 | 134              |
| 45 | Au/TiO <sub>2</sub>               | 1.0  | 0.037  | 150 | 15 | 0.5 | 79 | 79               |
| 46 | Au/TiO <sub>2</sub>               | 1.5  | 0.056  | 150 | 15 | 0.5 | 76 | 51               |
| 47 | Au/TiO <sub>2</sub>               | 0.5  | 0.0185 | 150 | 15 | 0.5 | 74 | 149 <sup>e</sup> |
| 48 | Au/TiO <sub>2</sub>               | 0.5  | 0.0185 | 150 | 15 | 0.5 | 73 | 146 <sup>f</sup> |
| 49 | ZnO                               | 10.0 | 0.0024 | 150 | 15 | 0.5 | 31 | 3                |
| 50 | Fe <sub>2</sub> O <sub>3</sub>    | 10.0 | 0.0048 | 150 | 15 | 0.5 | 30 | 3                |
| 51 | TiO <sub>2</sub>                  | 10.0 | 0.0024 | 150 | 15 | 0.5 | 27 | 3                |
| 52 | Al <sub>2</sub> O <sub>3</sub>    | 10.0 | 0.0031 | 150 | 15 | 0.5 | 27 | 3                |

<sup>a</sup> Reaction conditions: benzyl bromide (0.30 mmol), phenylacetylene (0.33 mmol), NaN<sub>3</sub> (0.33 mmol), H<sub>2</sub>O: MeCN (1:1 v/v), MW (30 W). <sup>b</sup> Calculated vs. benzyl bromide. <sup>c</sup> Isolated yield. <sup>d</sup> Turnover number = moles of product per mol of catalyst. <sup>e</sup> NH<sub>4</sub>OH (0.66 mmol) was added to the reaction mixture. <sup>f</sup> Trifluoroacetic acid (0.66 mmol) was added to the reaction mixture.

## 2. N<sub>2</sub> adsorption-desorption isotherms and pore size distributions for the metal oxide supports

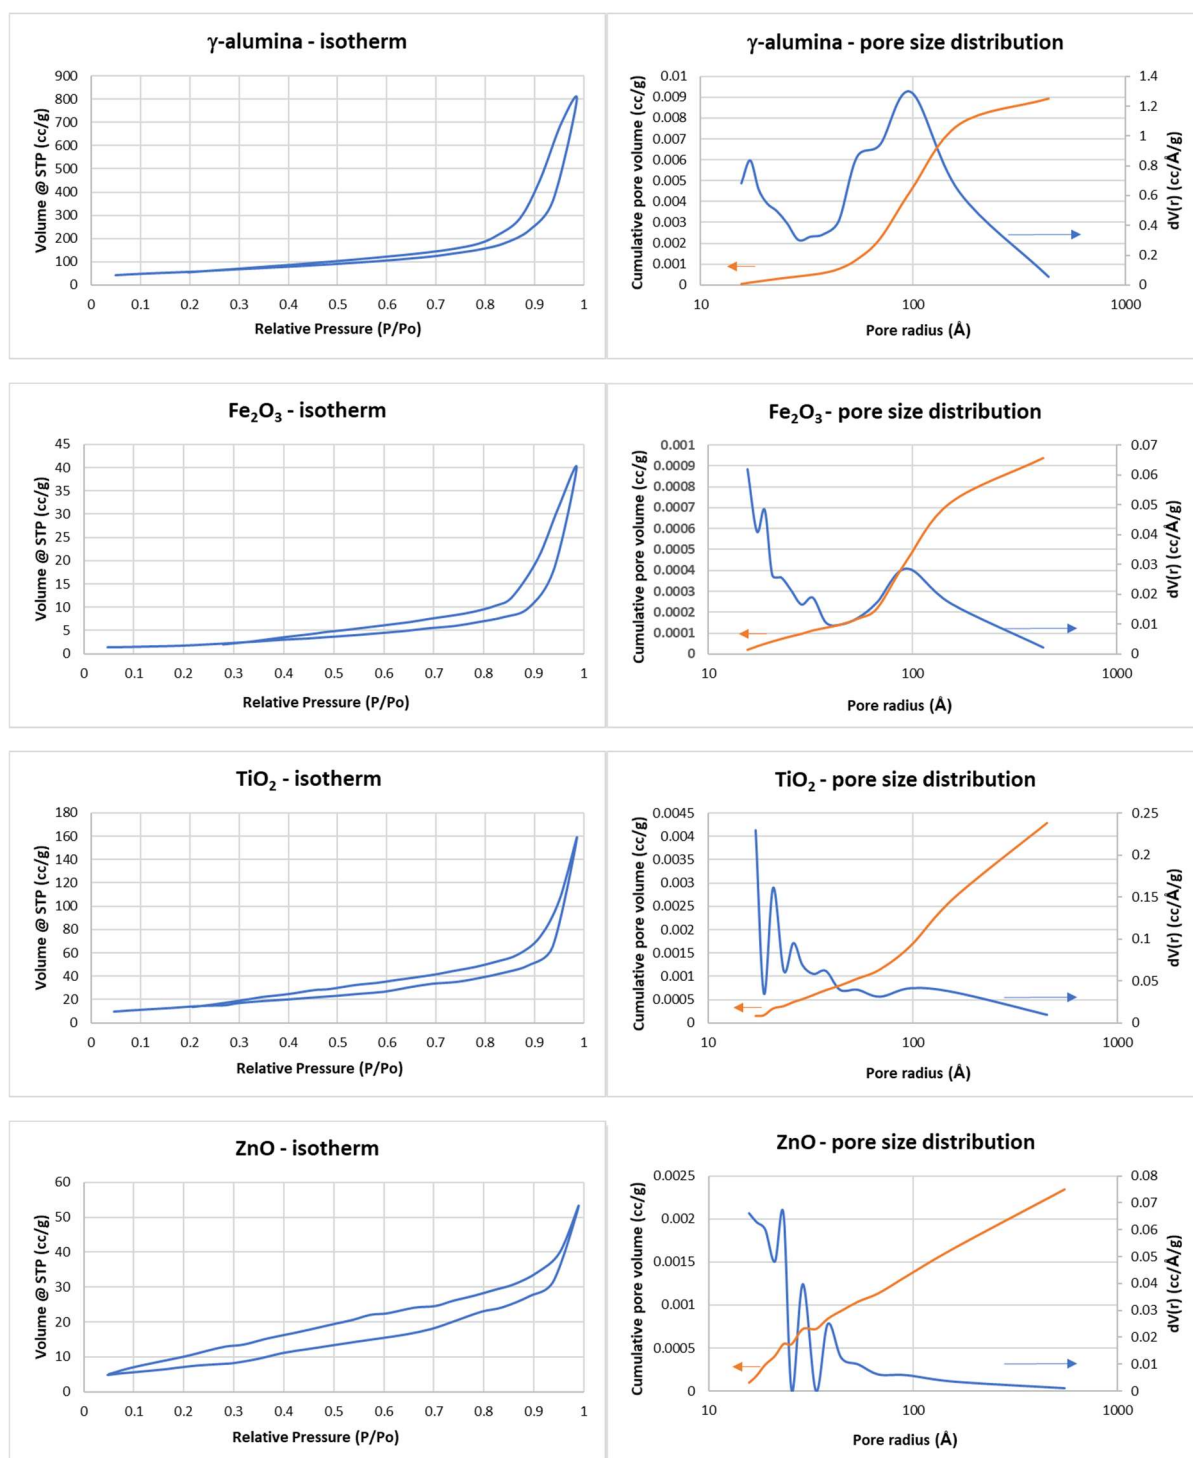

**Figure S1.** N<sub>2</sub> adsorption-desorption isotherms obtained at -196 °C and respective pore size distributions (BJH desorption) for the metal oxide supports.

### 3. $^1\text{H}$ NMR spectra of 1,2,3-triazoles obtained by AuNPs catalyzed AAC

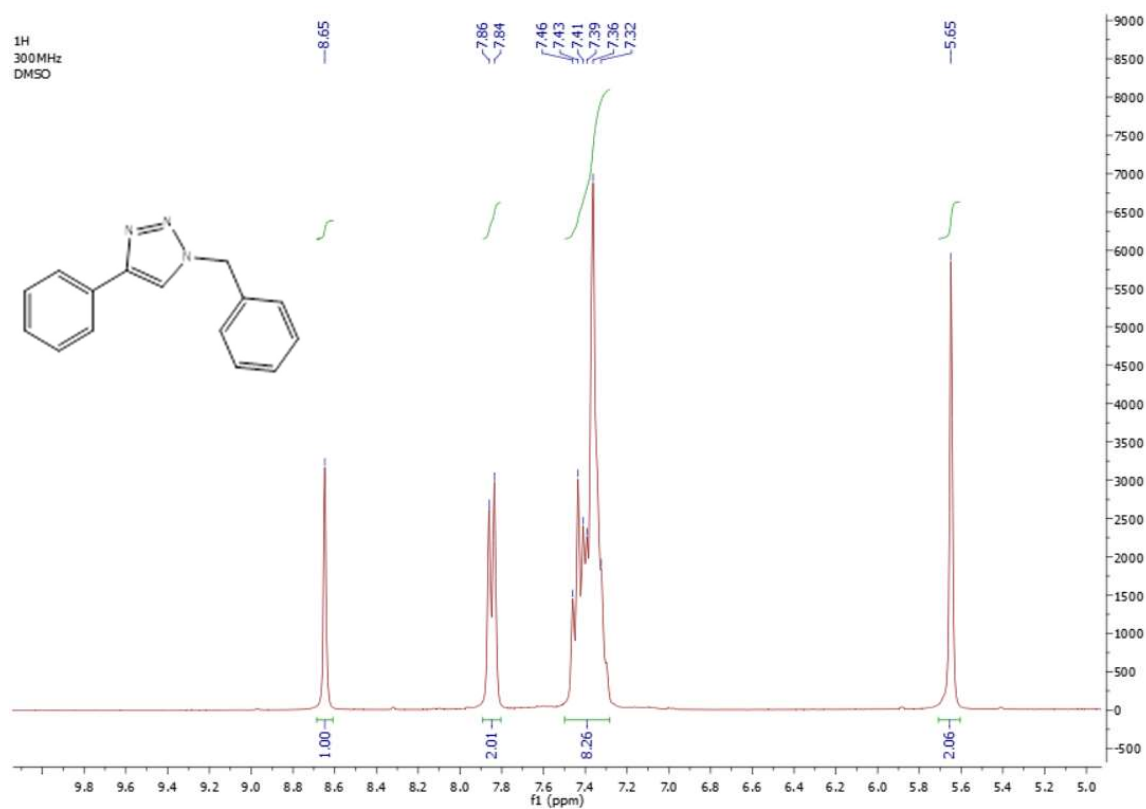

**Figure S2.**  $^1\text{H}$  NMR spectrum of 1-benzyl-4-phenyl-1H-1,2,3-triazole obtained by AAC catalysed by Au/TiO<sub>2</sub> NPs at 150 °C.

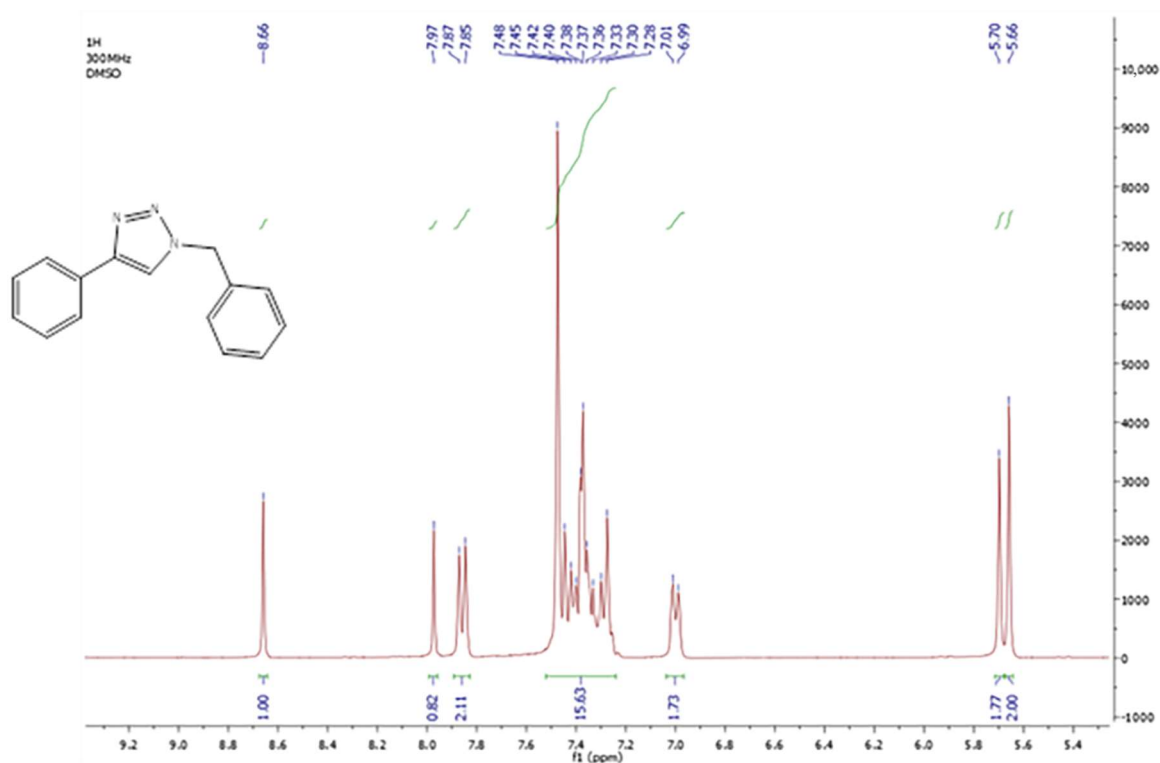

**Figure S3.**  $^1\text{H}$  NMR spectrum of a blank sample at 150 °C.

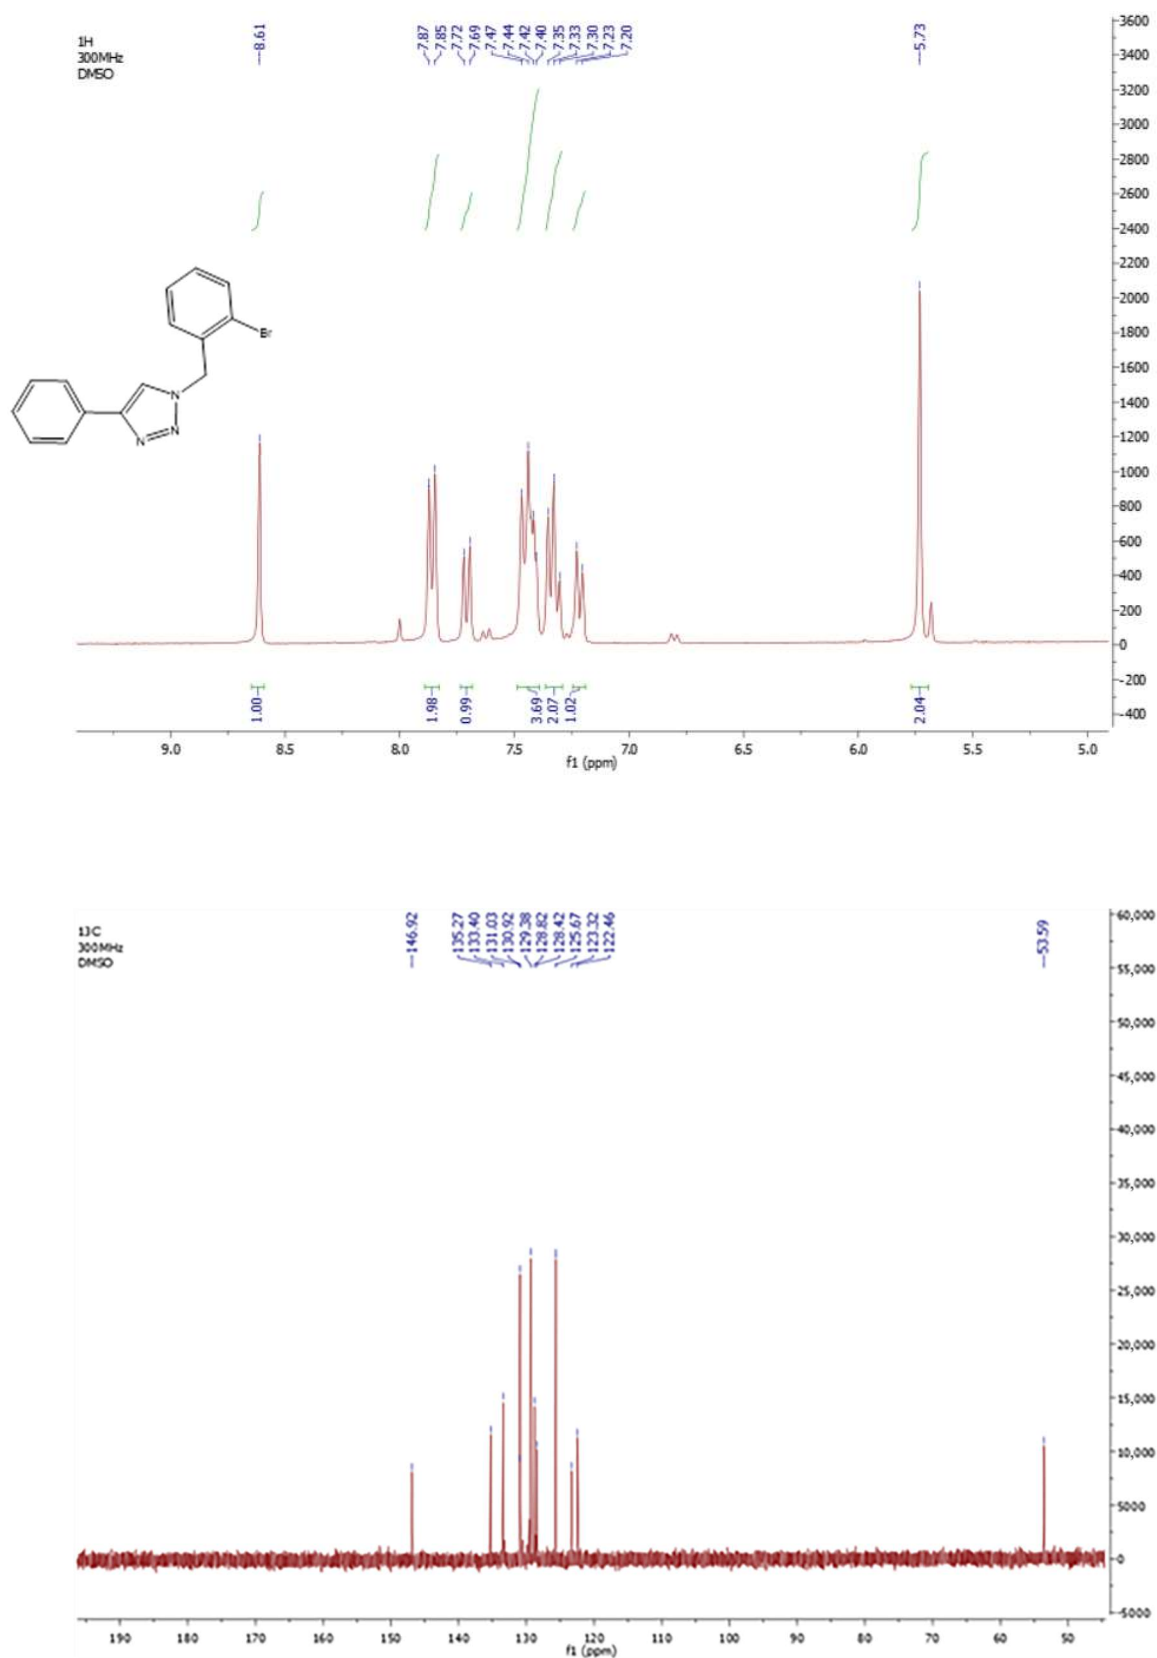

**Figure S4.** <sup>1</sup>H and <sup>13</sup>C NMR spectra of 1-(2-bromobenzyl)-4-phenyl-1H-1,2,3-triazole.

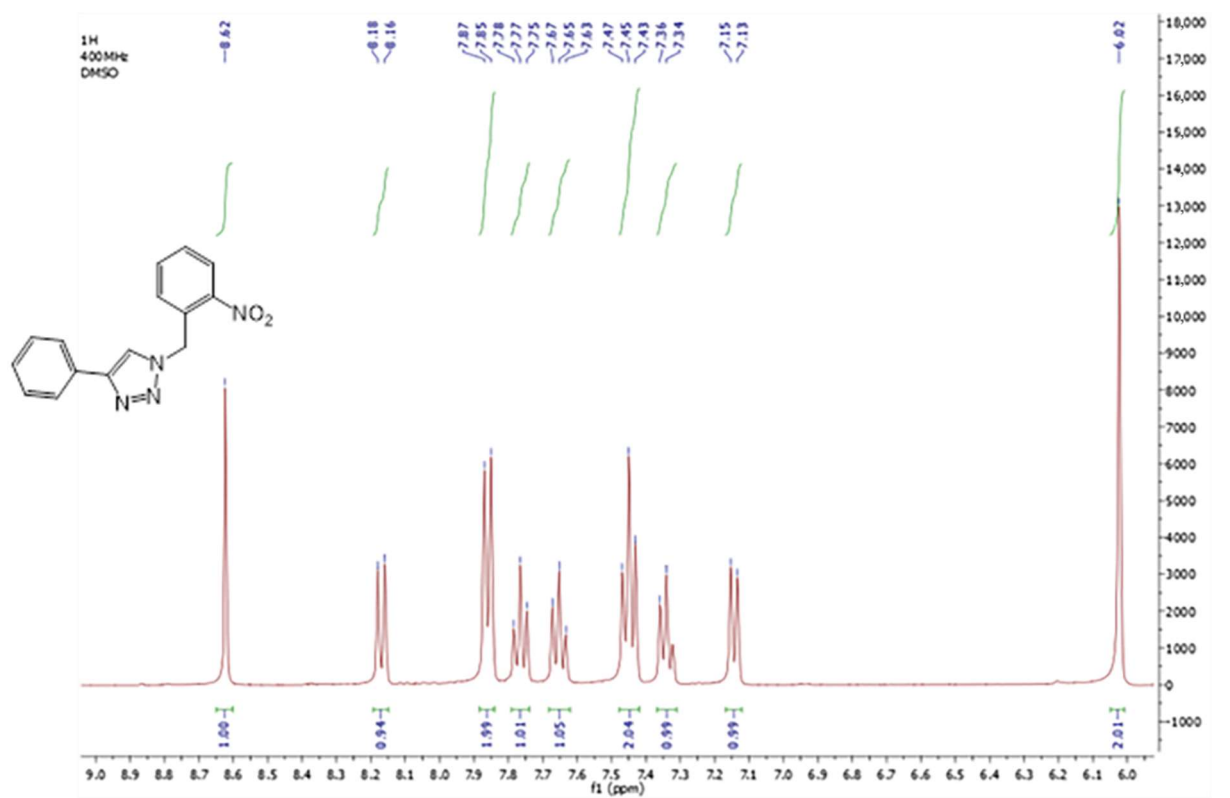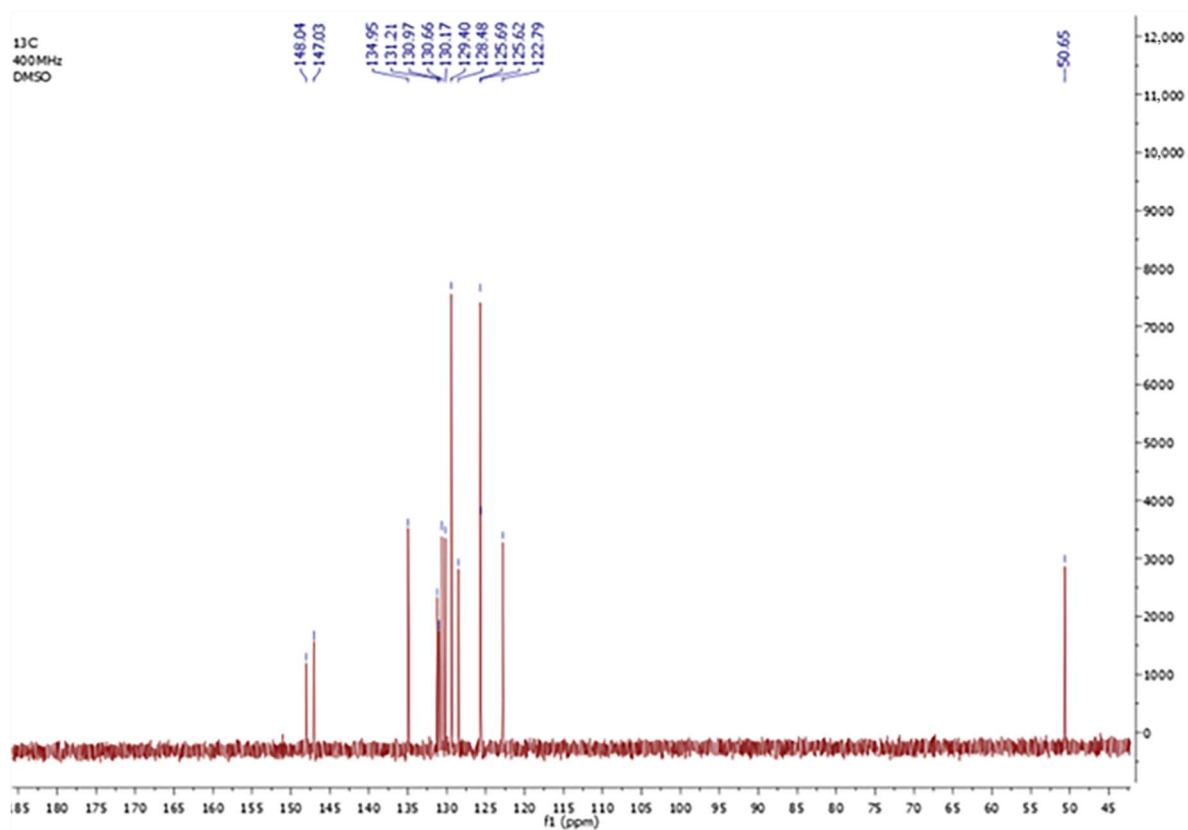

Figure S5. <sup>1</sup>H and <sup>13</sup>C NMR spectra of 1-(2-nitrobenzyl)-4-phenyl-1H-1,2,3-triazole.

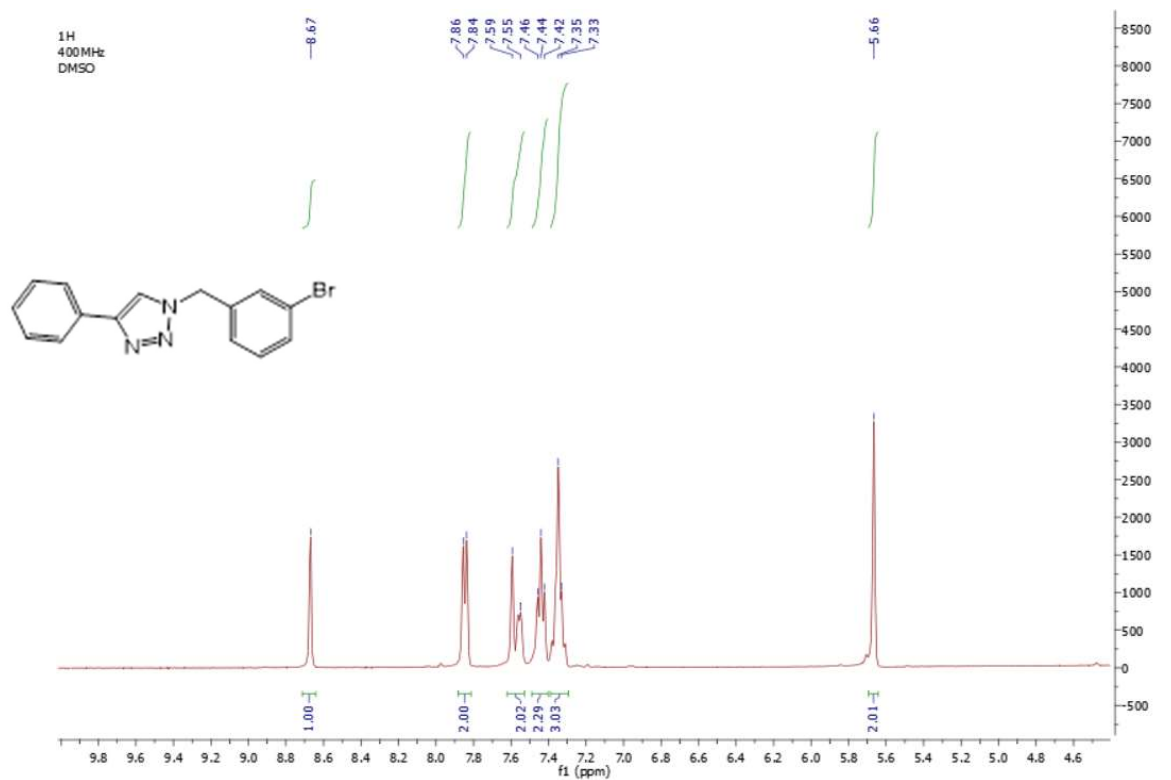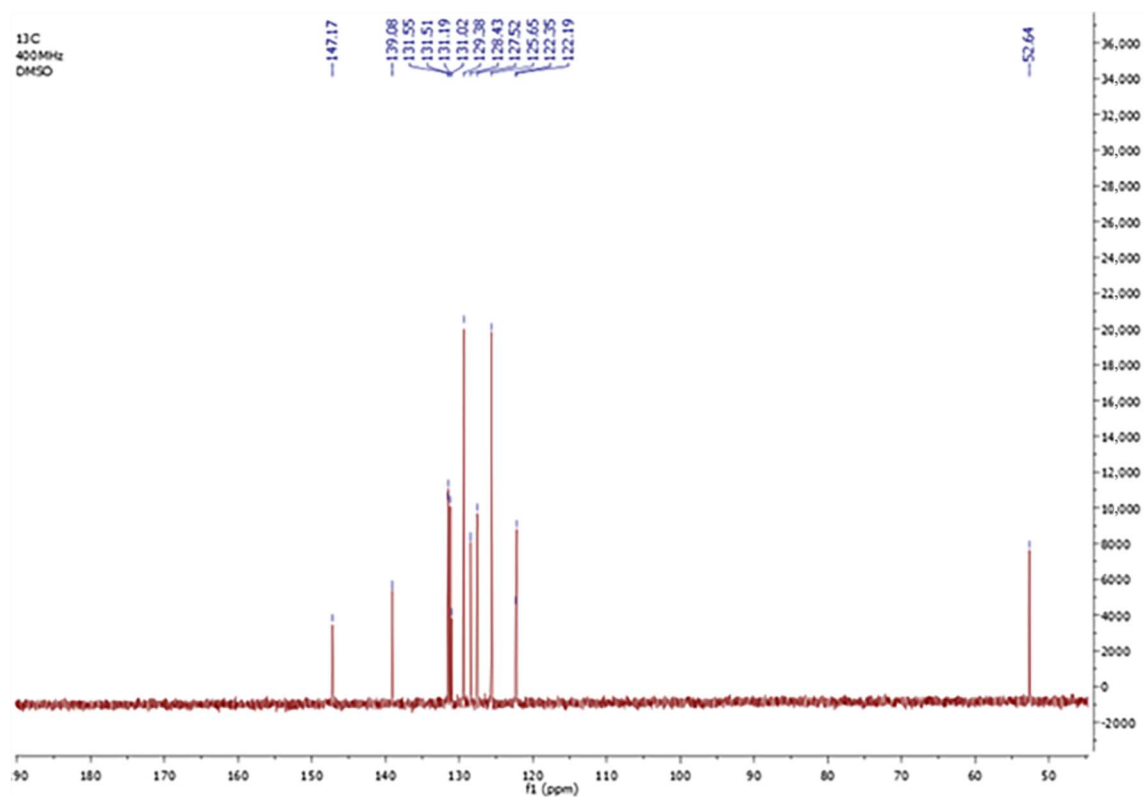

Figure S6. <sup>1</sup>H and <sup>13</sup>C NMR spectra of 1-(3-bromobenzyl)-4-phenyl-1H-1,2,3-triazole.

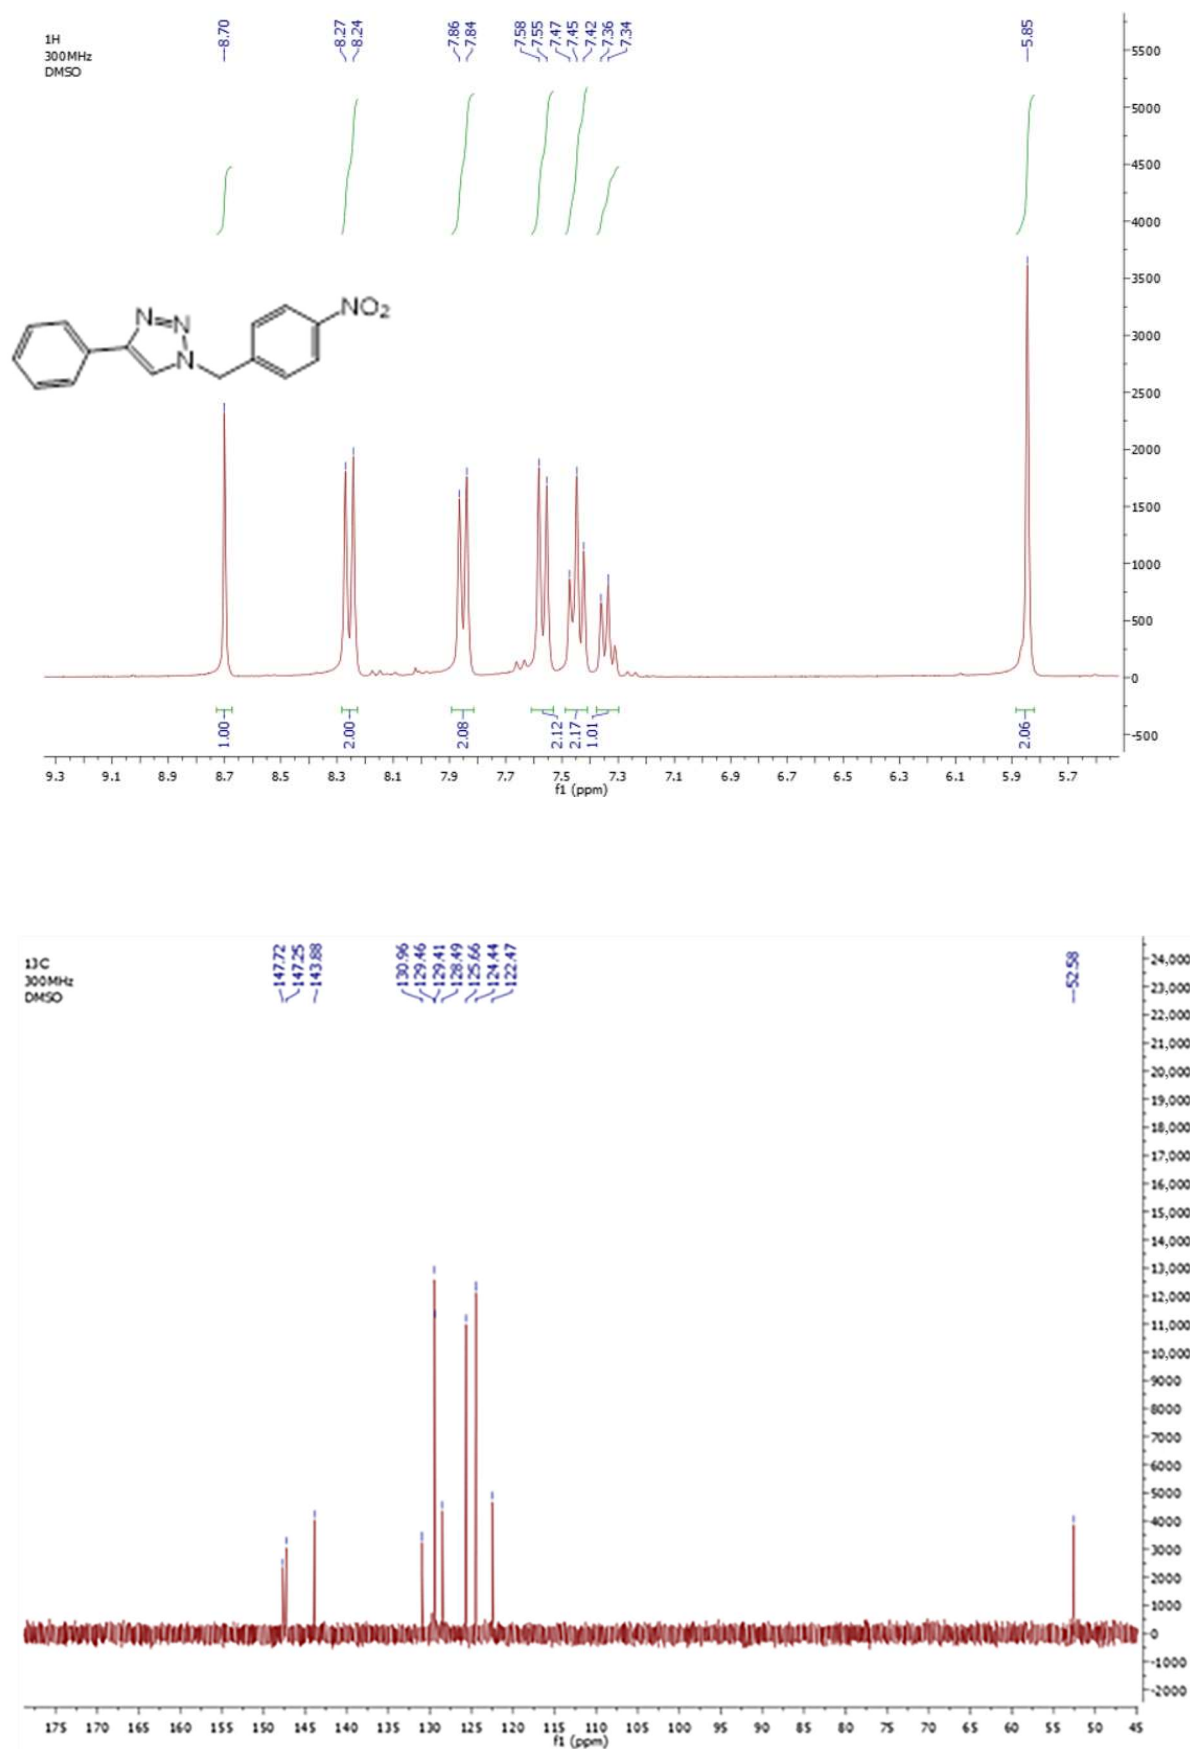

Figure S7. <sup>1</sup>H and <sup>13</sup>C NMR spectra of 1-(4-nitrobenzyl)-4-phenyl-1H-1,2,3-triazole.

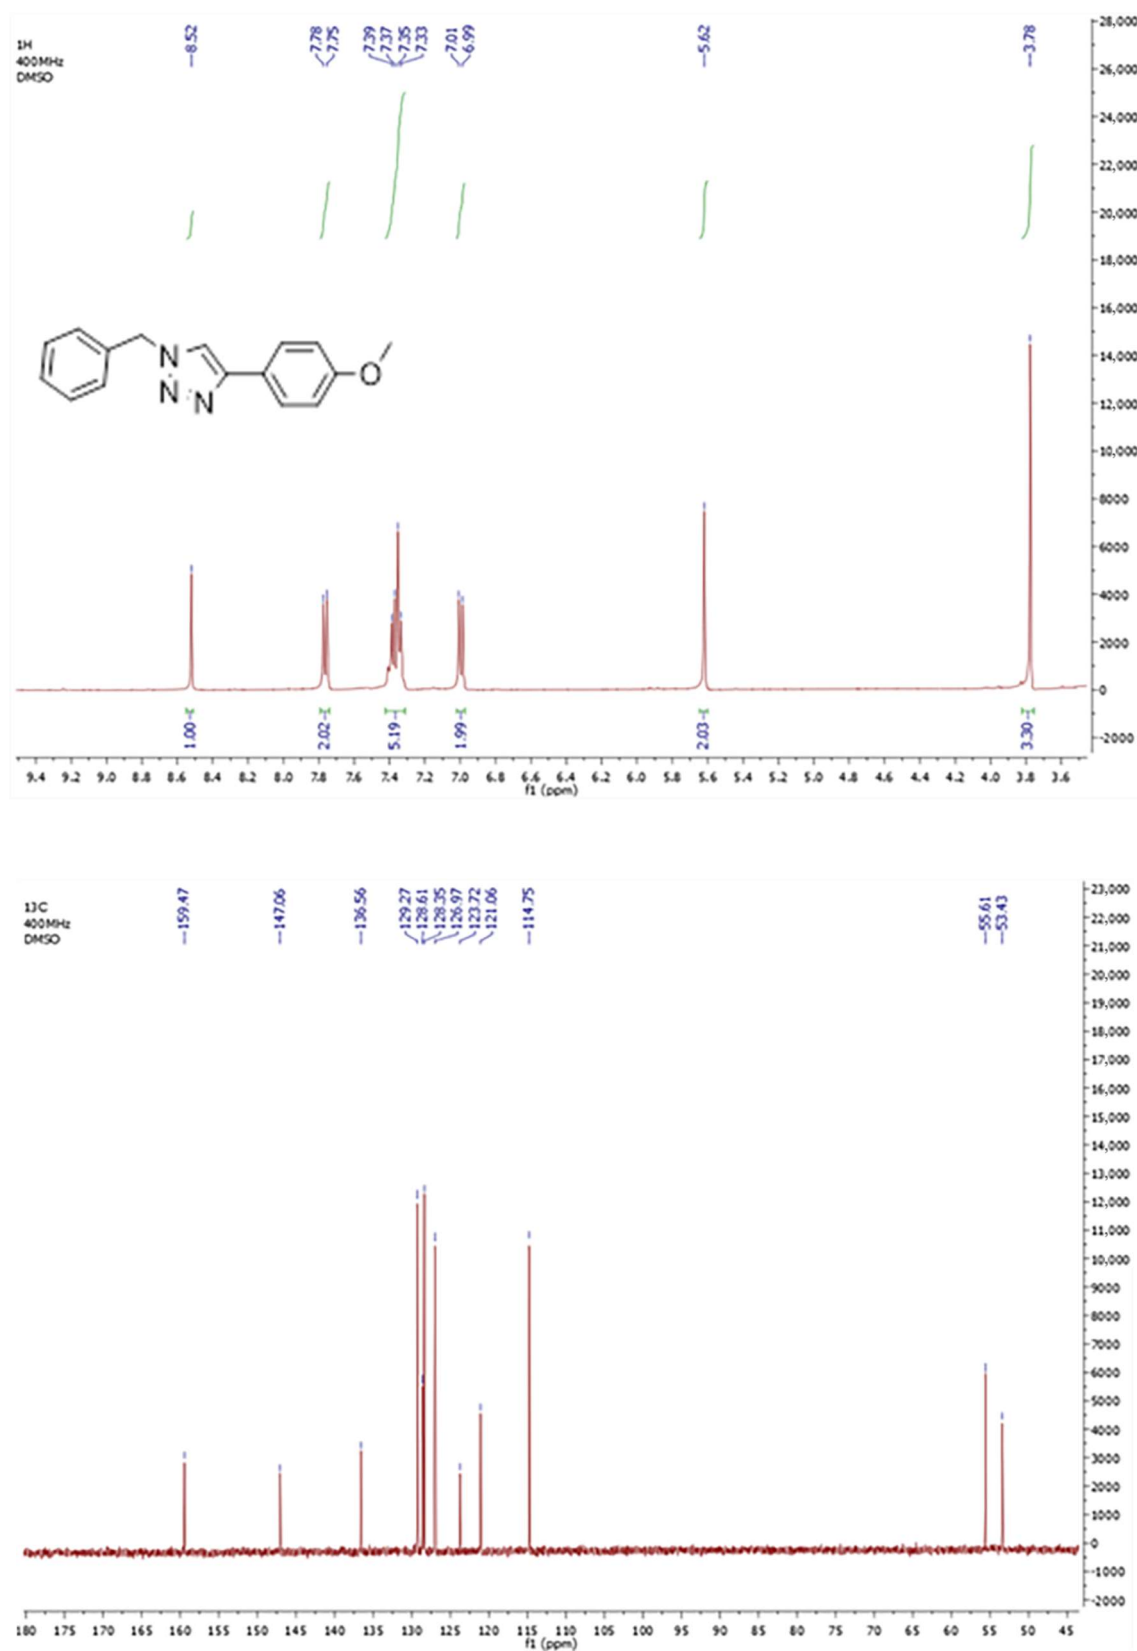

Figure S8. <sup>1</sup>H and <sup>13</sup>C NMR spectra of 1-benzyl-4-(4-methoxyphenyl)-1H-1,2,3-triazole.

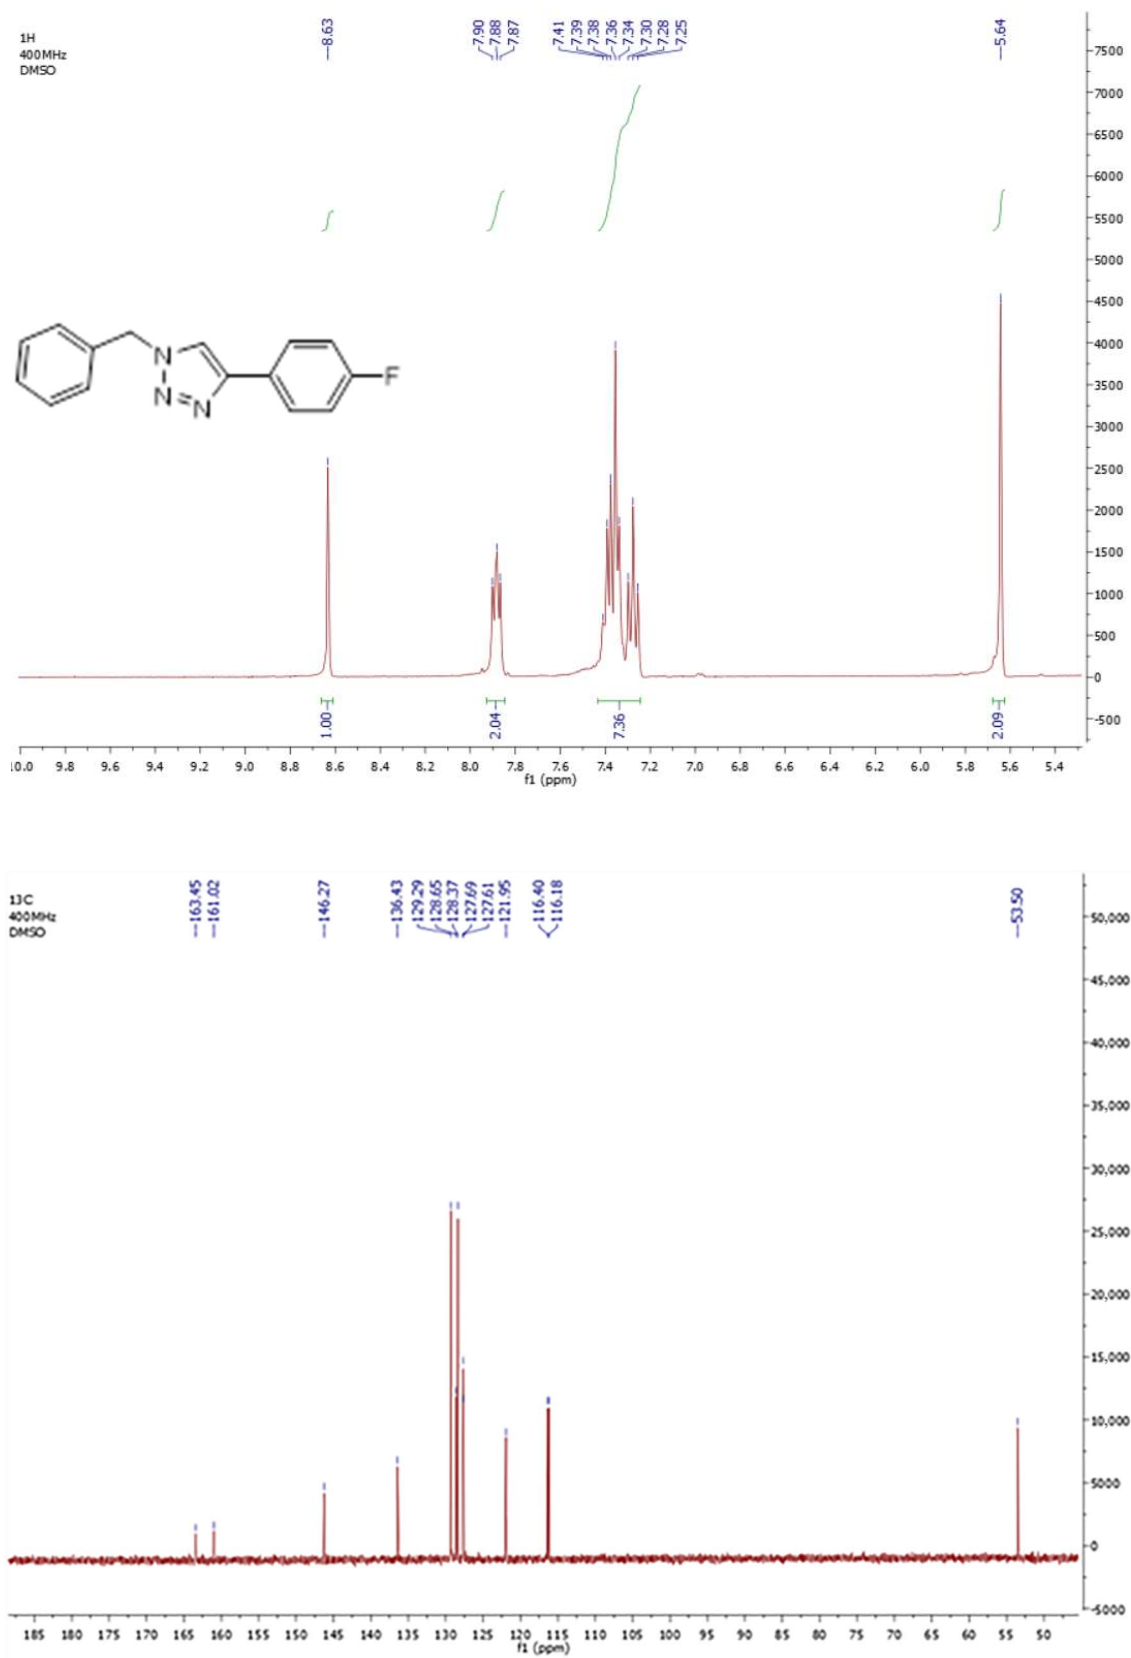

**Figure S9.** <sup>1</sup>H and <sup>13</sup>C NMR spectra of 1-benzyl-4-(4-fluorophenyl)-1H-1,2,3-triazole.

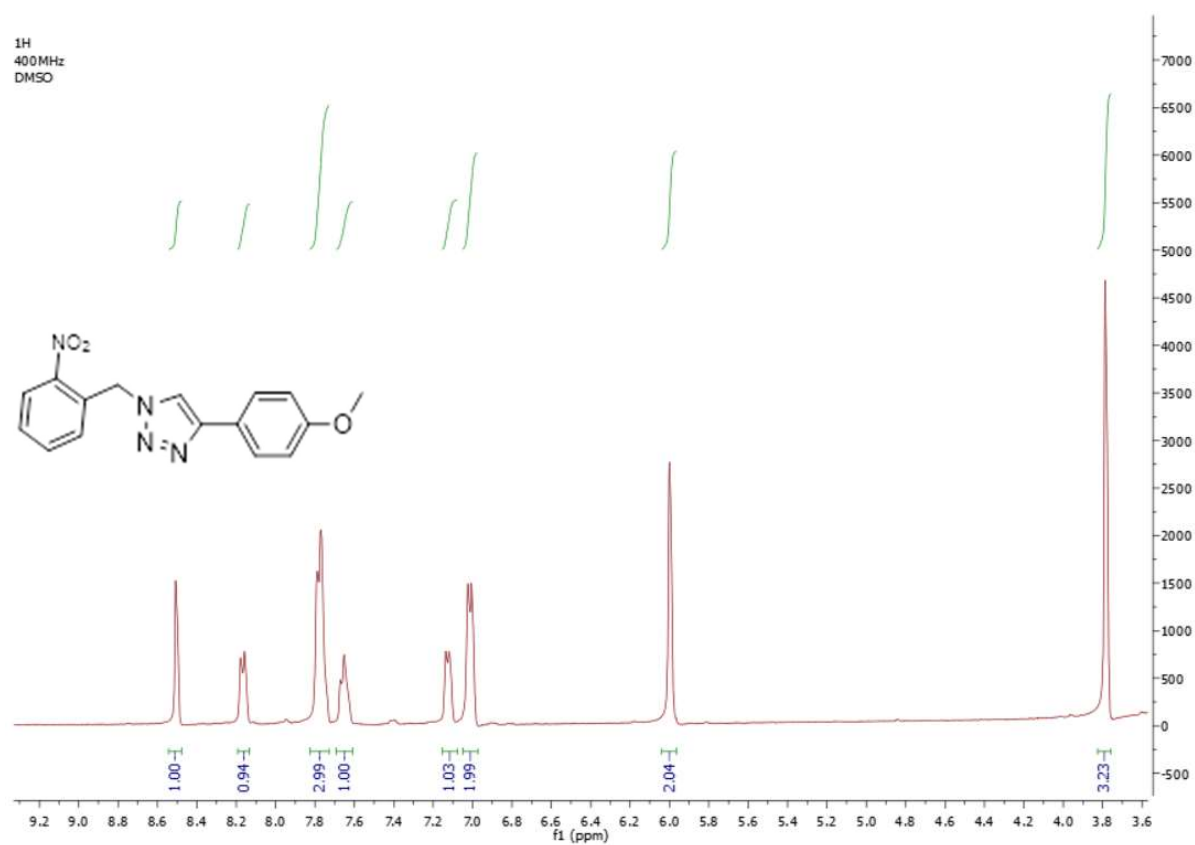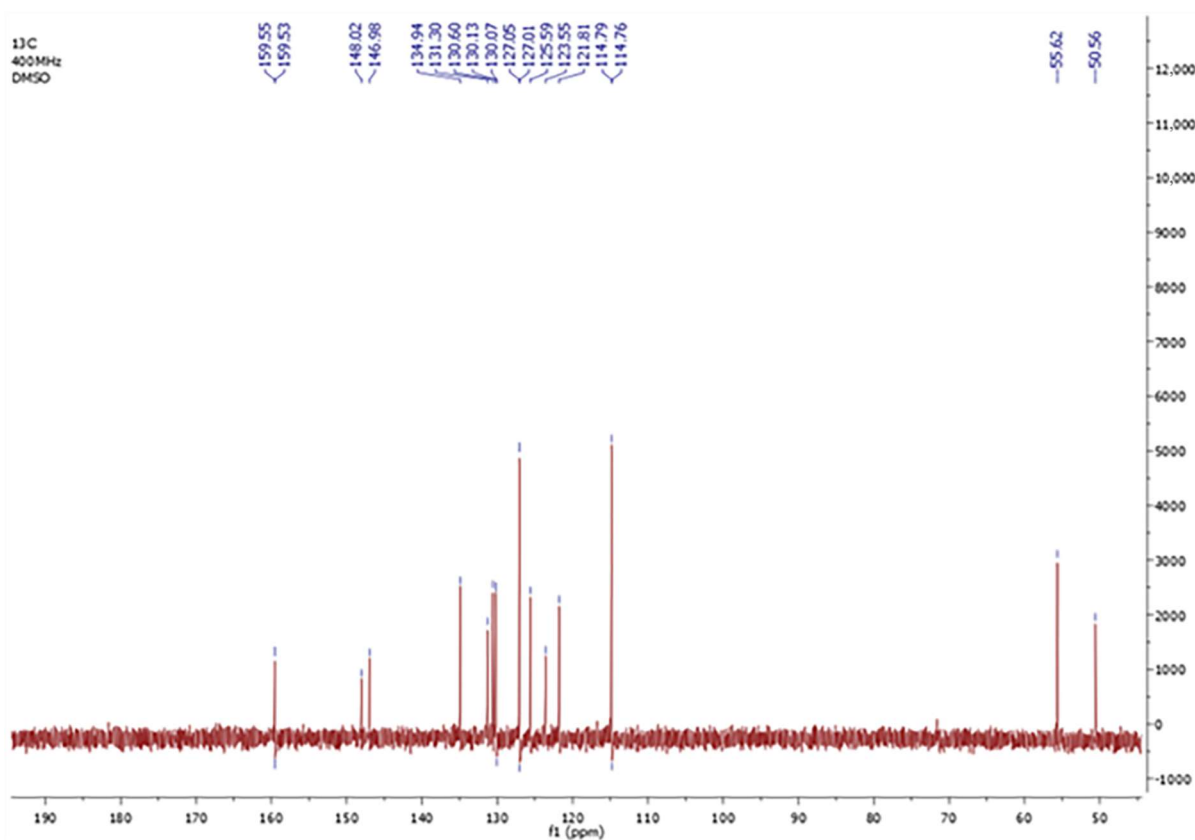

**Figure S10.** <sup>1</sup>H and <sup>13</sup>C NMR spectra of 4-(4-methoxyphenyl)-1-(2-nitrobenzyl)-1H-1,2,3-triazole.

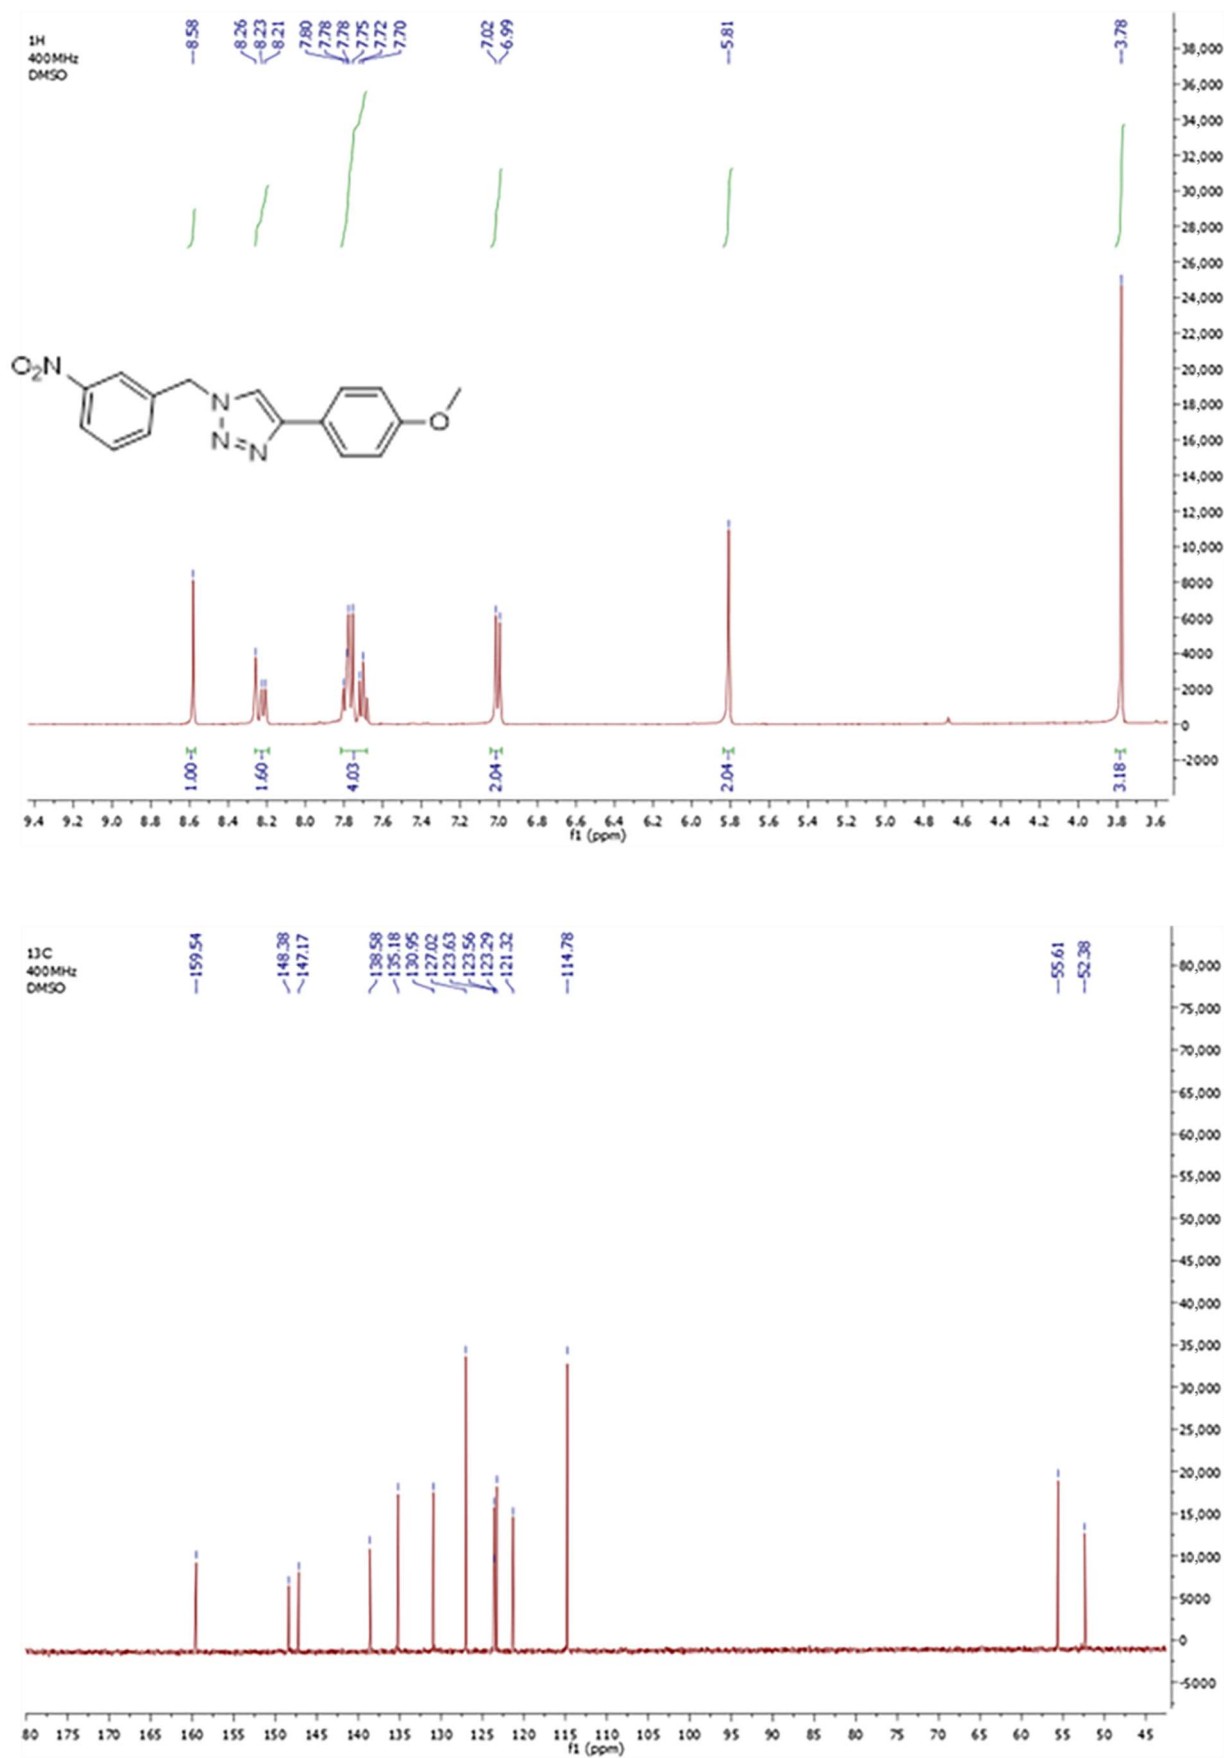

Figure S11. <sup>1</sup>H and <sup>13</sup>C NMR spectra of 4-(4-methoxyphenyl)-1-(3-nitrobenzyl)-1H-1,2,3-triazole.

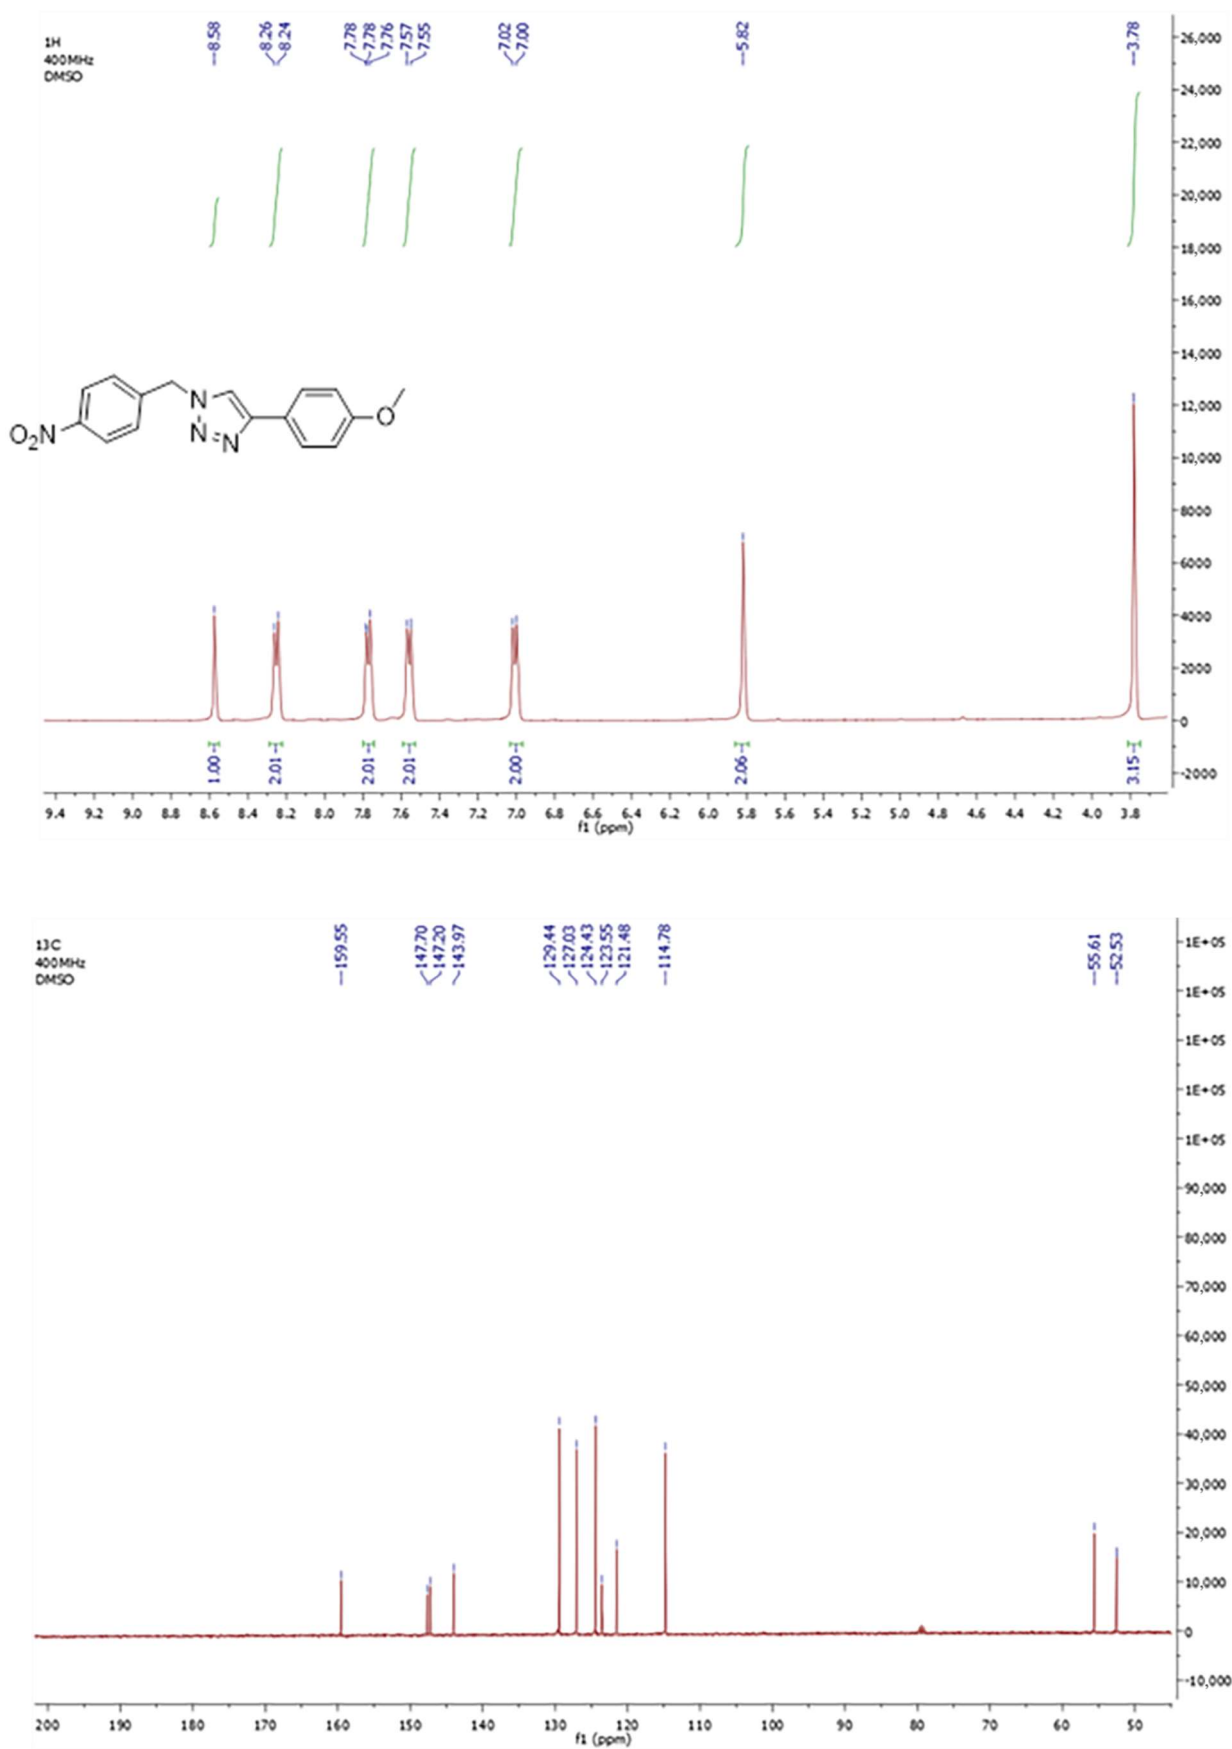

Figure S12. <sup>1</sup>H and <sup>13</sup>C NMR spectra of 4-(4-methoxyphenyl)-1-(4-nitrobenzyl)-1H-1,2,3-triazole.

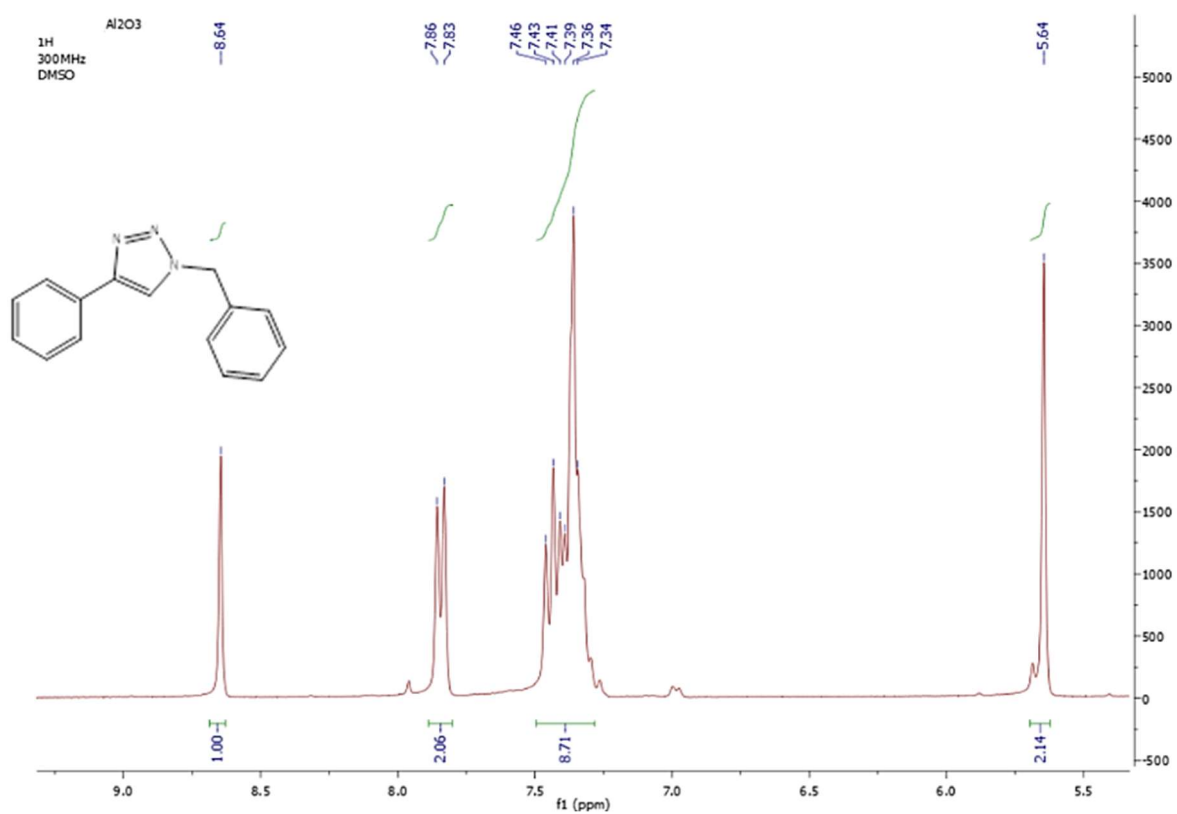

**Figure S13.** <sup>1</sup>H NMR spectrum of 1-benzyl-4-phenyl-1H-1,2,3-triazole from reaction catalysed by Al<sub>2</sub>O<sub>3</sub> at 150 °C.

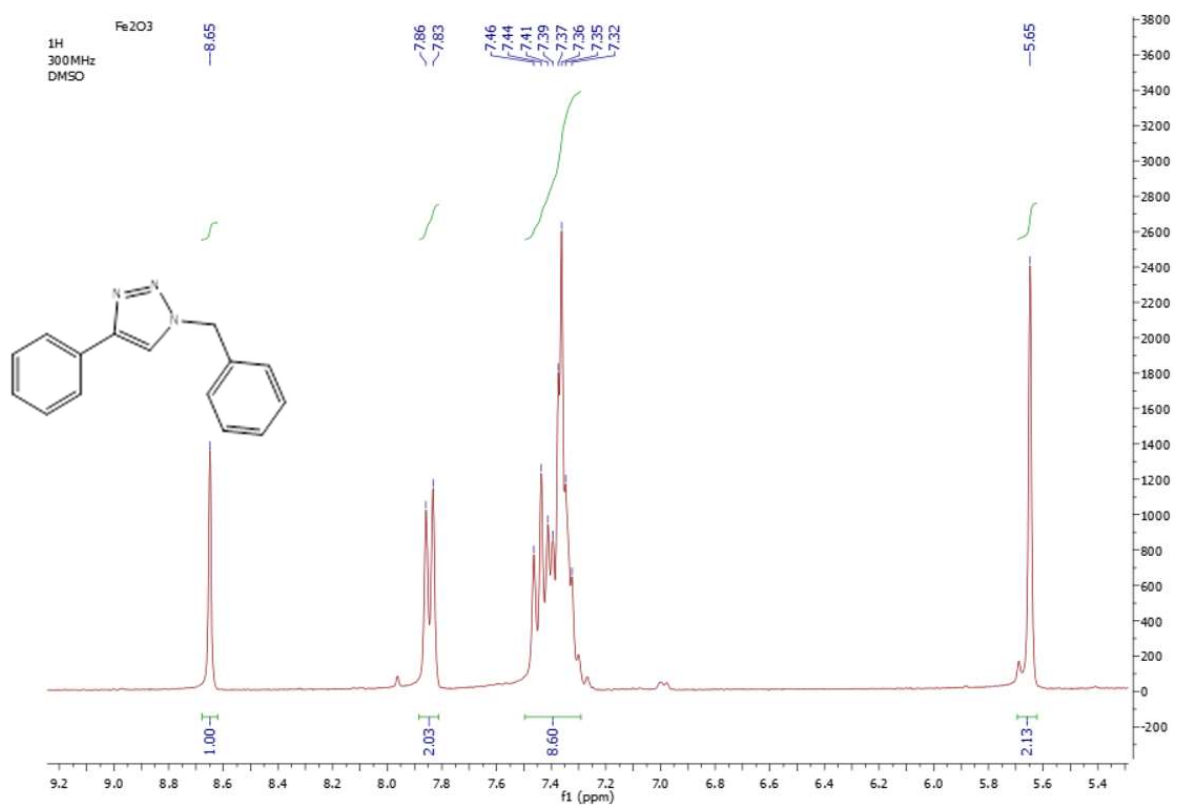

**Figure S14.** <sup>1</sup>H NMR spectrum of 1-benzyl-4-phenyl-1H-1,2,3-triazole from reaction catalysed by Fe<sub>2</sub>O<sub>3</sub> at 150 °C.

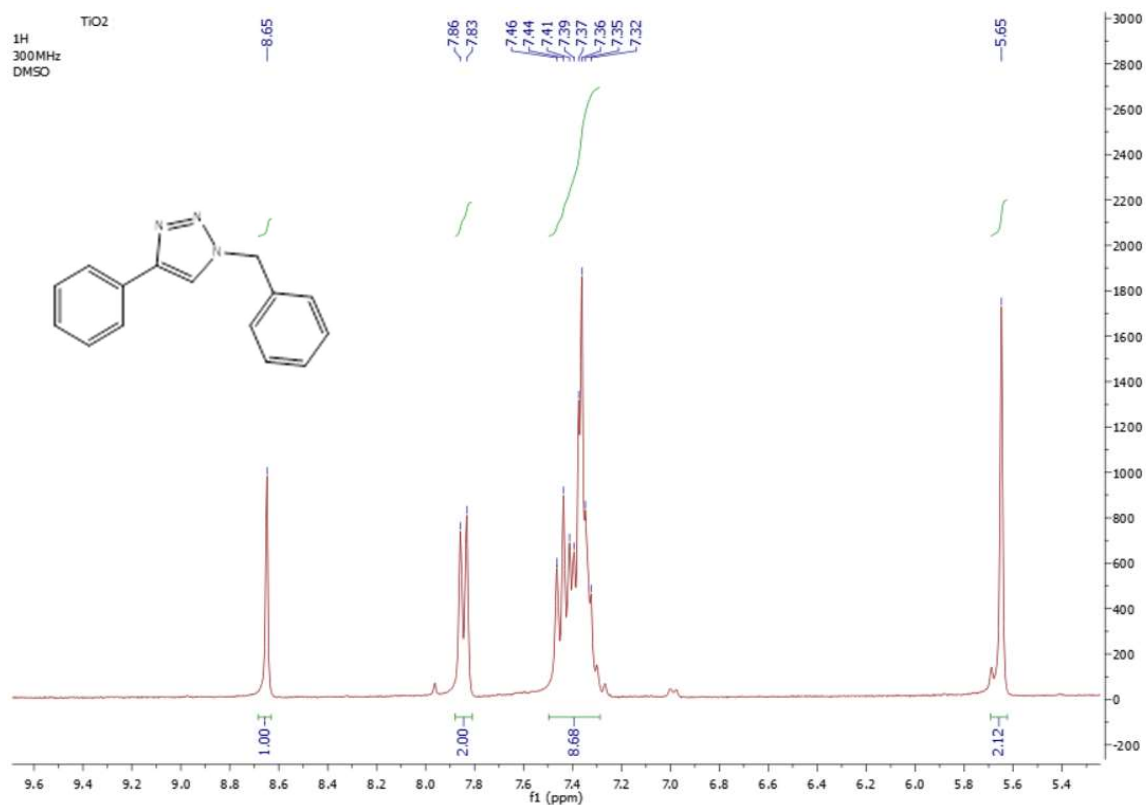

**Figure S15.** <sup>1</sup>H NMR spectrum of 1-benzyl-4-phenyl-1H-1,2,3-triazole from reaction catalysed by TiO<sub>2</sub> at 150 °C.

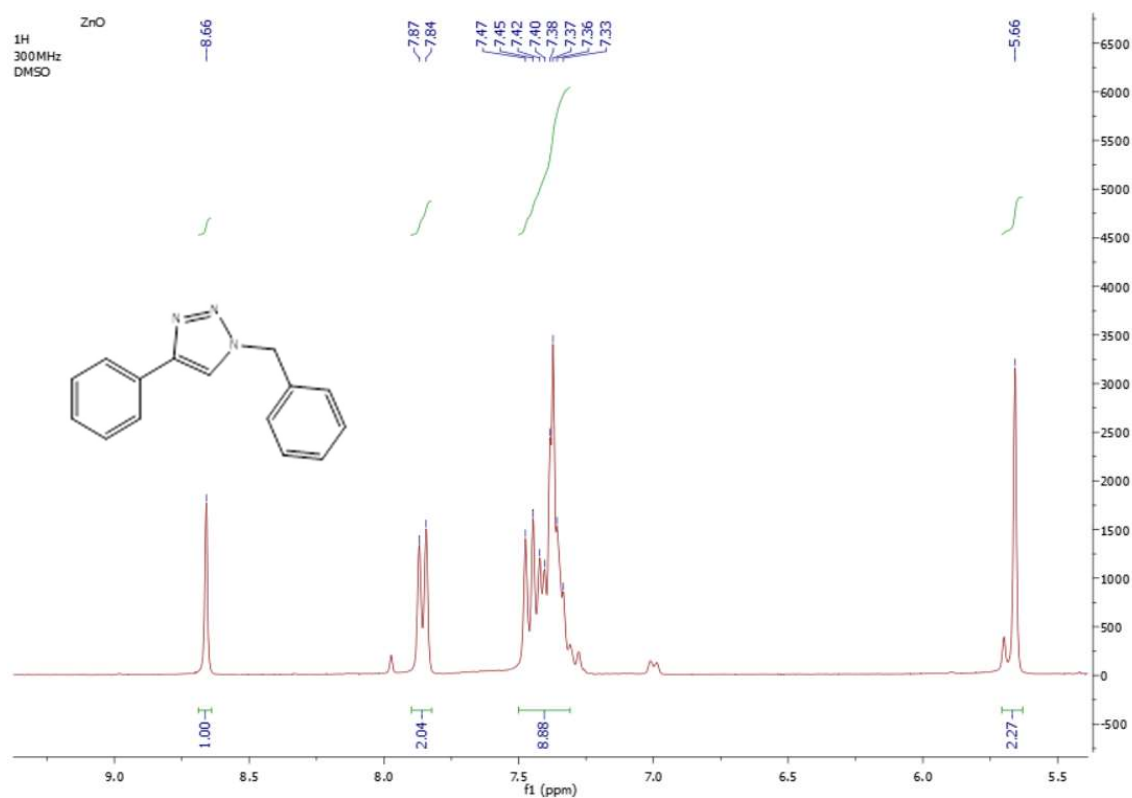

**Figure S16.** <sup>1</sup>H NMR spectrum of 1-benzyl-4-phenyl-1H-1,2,3-triazole from reaction catalysed by ZnO at 150 °C.

4. TEM images of Au/ TiO<sub>2</sub> after recycling (the darker spots correspond to Au NPs).

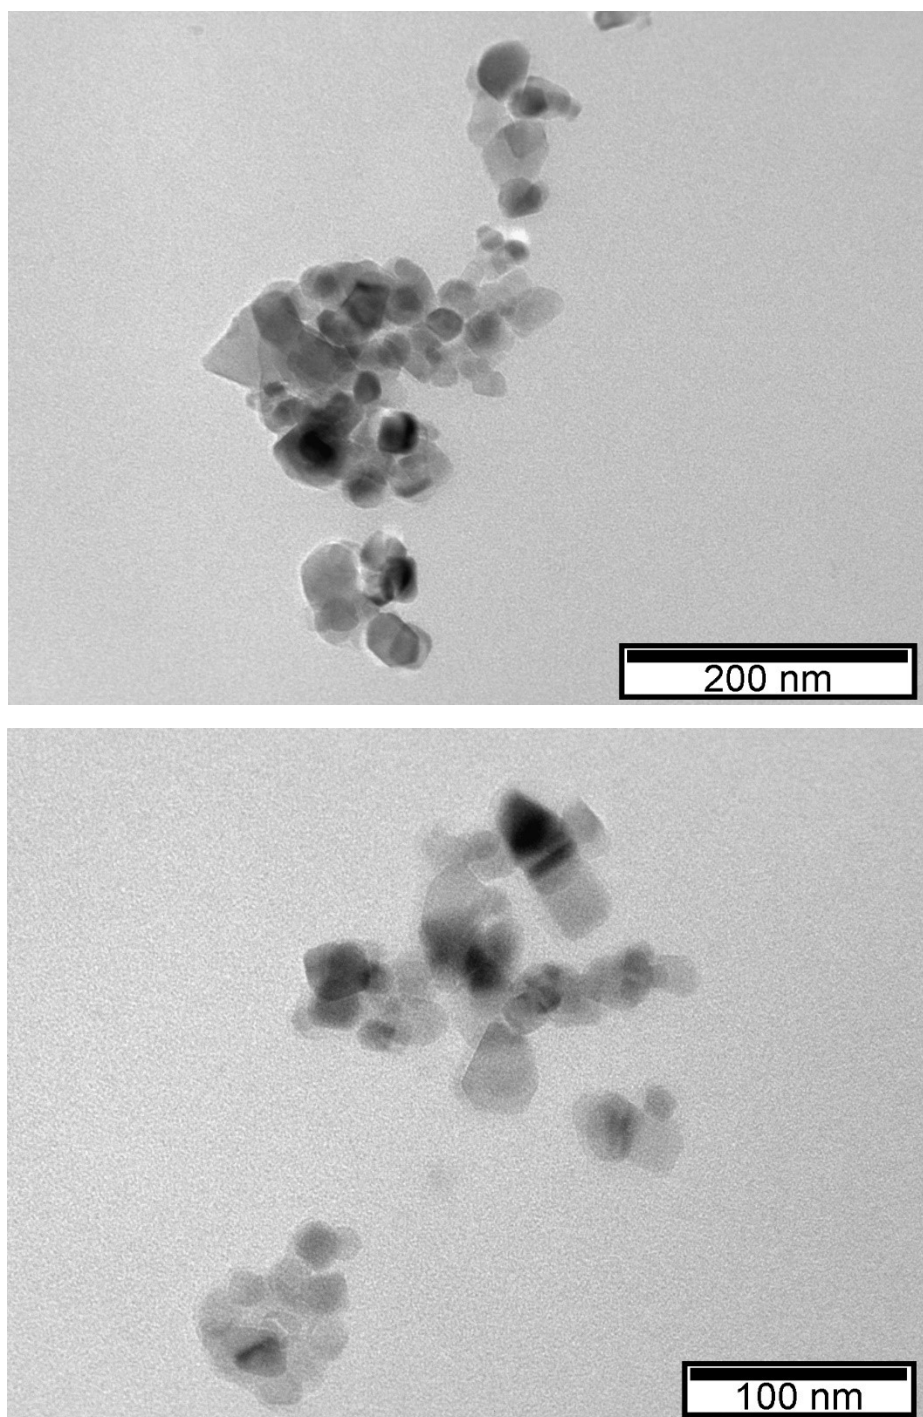

**Figure S17.** TEM images of Au/TiO<sub>2</sub> after 5 cycle runs.

5. The O 1s XPS spectra of the metal oxide supports and the Au-based materials.

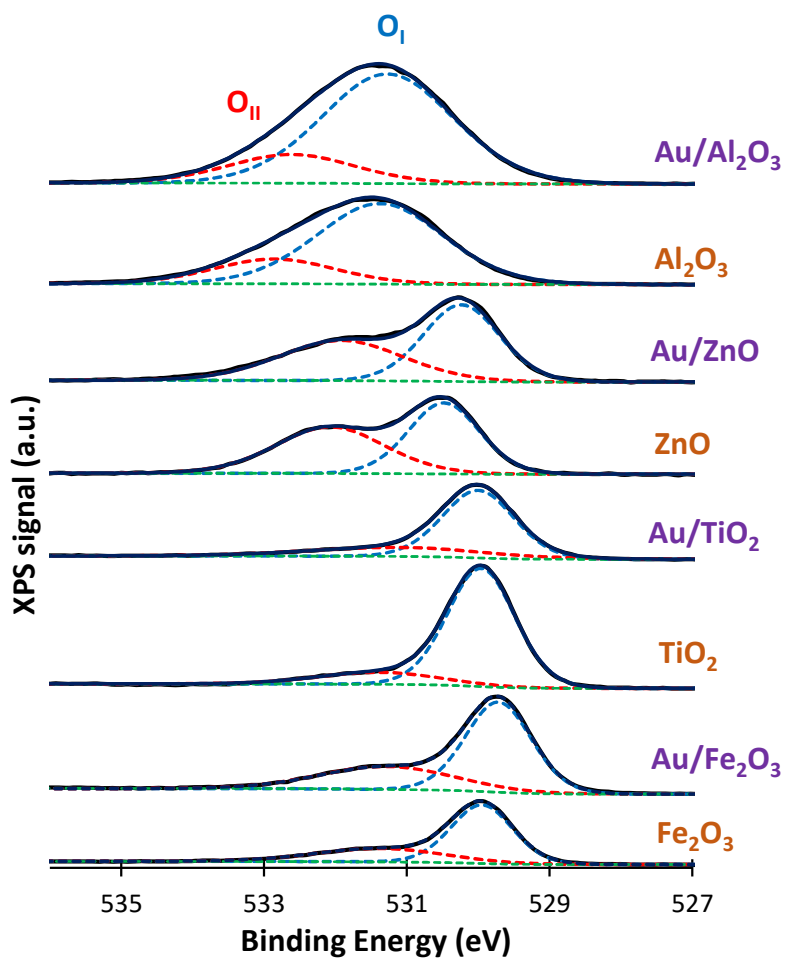

**Figure S18.** O 1s XPS spectrum of metal oxides and supported Au NP-based catalysts (adapted from Martins, L.M.D.R.S.; Carabineiro, S.A.C.; Wang, J.; Rocha, B.G.M.; Maldonado-Hódar, F.J.; Pombeiro, A.J.L. Supported Gold Nanoparticles as Reusable Catalysts for Oxidation Reactions of Industrial Significance. *ChemCatChem* **2017**, *9*, 1211–1221, doi:10.1002/cctc.201601442 with permission from Wiley).
